# Supplementary material for: Dynamic stability of Pt-based alloys for fuel-cell catalysts calculated from atomistics
Source: Royal Society of Chemistry journal article supplement (doi:10.1039/d4cy00463a), 2024-01-01
Supplement: d4cy00463a1.pdf [file d4cy00463a1.pdf]

Supporting Information for

# “Dynamic stability of Pt-based alloys for fuel-cell catalysts calculated from atomistics”

Shubham Sharma, Cheng Zeng, and Andrew A. Peterson

## 1 RPBE optimized lattice constants

Table S1: RPBE optimized lattice constants of the Pt-based alloys considered in this study

| System                              | a (Å) | b (Å) | c (Å) |
|-------------------------------------|-------|-------|-------|
| L1 <sub>0</sub> -PtFe               | 3.903 | 3.903 | 3.795 |
| L1 <sub>0</sub> -PtCo               | 3.822 | 3.822 | 3.797 |
| L1 <sub>0</sub> -PtNi               | 3.867 | 3.867 | 3.689 |
| L1 <sub>2</sub> -Pt <sub>3</sub> Fe | 3.887 | 3.887 | 3.887 |
| L1 <sub>2</sub> -Pt <sub>3</sub> Co | 3.889 | 3.889 | 3.889 |
| L1 <sub>2</sub> -Pt <sub>3</sub> Ni | 3.900 | 3.900 | 3.900 |
| L1 <sub>2</sub> -Pt <sub>3</sub> Sc | 4.031 | 4.031 | 4.031 |

## 2 Standard reduction potentials

Table S2: Standard reduction potentials (pH 0) for pure metals considered in this study obtained from Reference [1]

| Metal | Number of electrons transferred | Standard dissolution potential (V <sub>SHE</sub> ) |
|-------|---------------------------------|----------------------------------------------------|
| Pt    | 2                               | 1.18                                               |
| Co    | 2                               | -0.28                                              |
| Ni    | 2                               | -0.26                                              |
| Fe    | 2                               | -0.45                                              |
| Sc    | 3                               | -2.08                                              |

### 3 Schematics showing diffusion pathway in cubic alloys

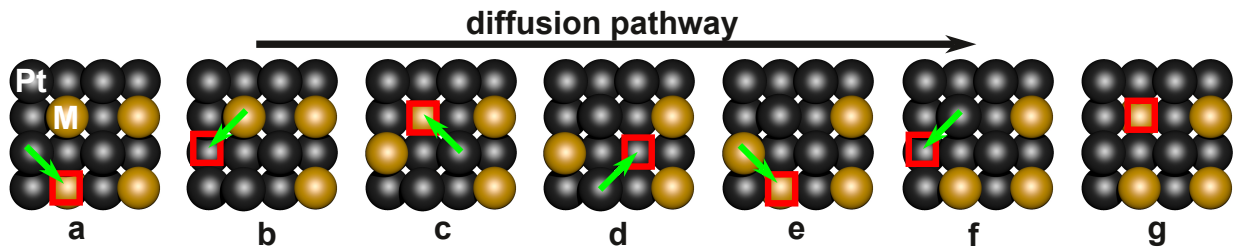

Figure S1: Schematic showing vacancy mediated bulk diffusion pathway for L<sub>12</sub>-Pt<sub>3</sub>M systems.

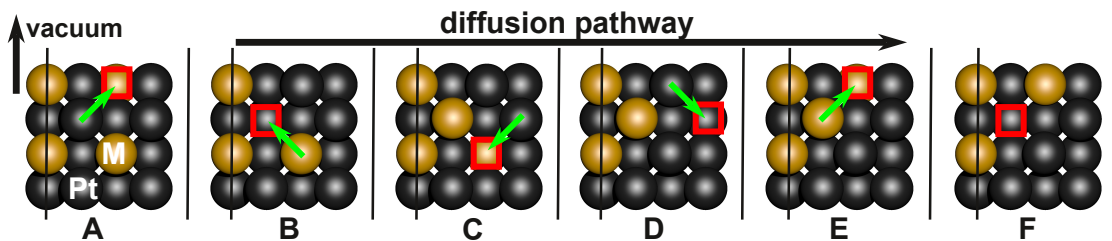

Figure S2: Schematic showing vacancy mediated "near-surface" diffusion pathway for L<sub>12</sub>-Pt<sub>3</sub>M systems.

## 4 DFT calculated dissolution potentials for elements in FCT and FCC Pt-based alloys

Table S3: Dissolution potential ( $\phi$ ) of Pt (in  $V_{\text{SHE}}$ ) on 111 facet of  $L1_0\text{-Pt}M$  and  $L1_2\text{-Pt}_3M$  surfaces as a function of Pt overlayers. Here,  $\text{Pt}_n$  denotes “ $n$ ” overlayers of Pt on an alloy system, created by replacing solute metal ( $M$ ) with Pt.

| System                  | Dissolution Potential ( $V_{\text{SHE}}$ ) | System                           | Dissolution Potential ( $V_{\text{SHE}}$ ) |
|-------------------------|--------------------------------------------|----------------------------------|--------------------------------------------|
| $L1_0\text{-PtFe}$      | 1.90                                       | $L1_2\text{-Pt}_3\text{Fe}$      | 2.07                                       |
| $L1_0\text{-PtFe/Pt}_1$ | 1.96                                       | $L1_2\text{-Pt}_3\text{Fe/Pt}_1$ | 1.76                                       |
| $L1_0\text{-PtFe/Pt}_2$ | 1.76                                       | $L1_2\text{-Pt}_3\text{Fe/Pt}_2$ | 1.69                                       |
| $L1_0\text{-PtCo}$      | 1.86                                       | $L1_2\text{-Pt}_3\text{Co}$      | 2.04                                       |
| $L1_0\text{-PtCo/Pt}_1$ | 1.91                                       | $L1_2\text{-Pt}_3\text{Co/Pt}_1$ | 1.74                                       |
| $L1_0\text{-PtCo/Pt}_2$ | 1.73                                       | $L1_2\text{-Pt}_3\text{Co/Pt}_2$ | 1.69                                       |
| $L1_0\text{-PtNi}$      | 1.82                                       | $L1_2\text{-Pt}_3\text{Ni}$      | 1.91                                       |
| $L1_0\text{-PtNi/Pt}_1$ | 1.74                                       | $L1_2\text{-Pt}_3\text{Ni/Pt}_1$ | 1.73                                       |
| $L1_0\text{-PtNi/Pt}_2$ | 1.62                                       | $L1_2\text{-Pt}_3\text{Ni/Pt}_2$ | 1.68                                       |
| -                       | -                                          | $L1_2\text{-Pt}_3\text{Sc}$      | 1.91                                       |
| -                       | -                                          | $L1_2\text{-Pt}_3\text{Sc/Pt}_1$ | 1.78                                       |
| -                       | -                                          | $L1_2\text{-Pt}_3\text{Sc/Pt}_2$ | 1.52                                       |

Table S4: Dissolution potential ( $\phi$ ) of  $M$  (in  $V_{\text{SHE}}$ ) on 111 facet of  $L1_0\text{-Pt}M$  and  $L1_2\text{-Pt}_3M$  surfaces

| System             | Dissolution Potential ( $V_{\text{SHE}}$ ) | System                      | Dissolution Potential ( $V_{\text{SHE}}$ ) |
|--------------------|--------------------------------------------|-----------------------------|--------------------------------------------|
| $L1_0\text{-PtFe}$ | 0.13                                       | $L1_2\text{-Pt}_3\text{Fe}$ | 0.27                                       |
| $L1_0\text{-PtCo}$ | 0.15                                       | $L1_2\text{-Pt}_3\text{Co}$ | -0.01                                      |
| $L1_0\text{-PtNi}$ | 0.17                                       | $L1_2\text{-Pt}_3\text{Ni}$ | 0.12                                       |
| -                  | -                                          | $L1_2\text{-Pt}_3\text{Sc}$ | -0.76                                      |

Table S5: Change in free energy,  $\Delta G$  associated with substitution of solute metal ( $M$ ) with a Pt atom in  $L1_0\text{-Pt}M$  and  $L1_2\text{-Pt}_3M$  surfaces. Here,  $\phi$  represents the potential in SHE scale.

| System             | $\Delta G$ (eV) | System                      | $\Delta G$ (eV) |
|--------------------|-----------------|-----------------------------|-----------------|
| $L1_0\text{-PtFe}$ | -3.39           | $L1_2\text{-Pt}_3\text{Fe}$ | -2.75           |
| $L1_0\text{-PtCo}$ | -3.30           | $L1_2\text{-Pt}_3\text{Co}$ | -3.20           |
| $L1_0\text{-PtNi}$ | -3.08           | $L1_2\text{-Pt}_3\text{Ni}$ | -3.01           |
| -                  | -               | $L1_2\text{-Pt}_3\text{Sc}$ | -8.9 - $e\phi$  |

## 5 Climbing-Image Nudged Elastic Band (CI-NEB) pathways for bulk diffusion

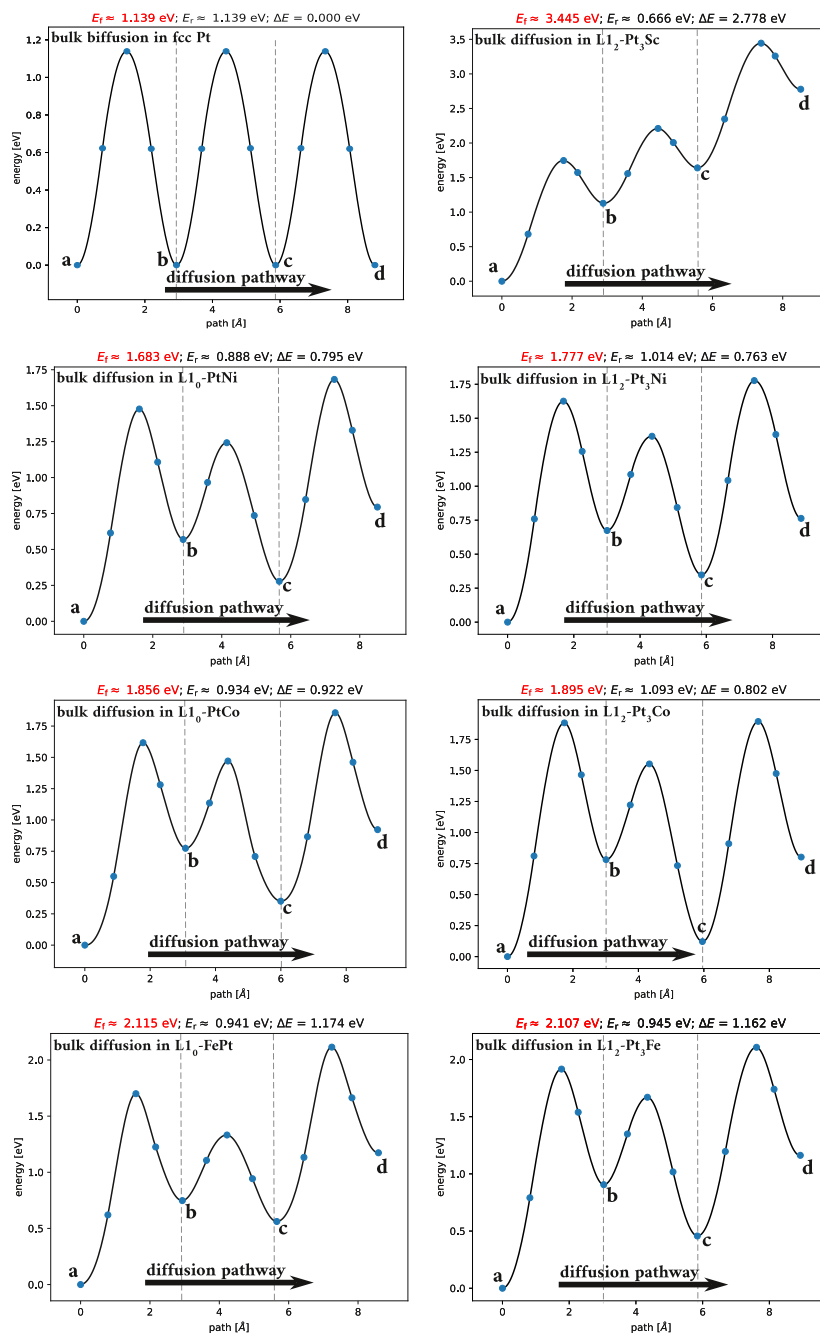

Figure S3: DFT calculated CI-NEB pathways for bulk diffusion in fcc Pt,  $L1_0$ -Pt $M$  and  $L1_2$ -Pt $_3M$  structures. The overall barrier (in eV) from configuration "a" to "d" (*i.e.*, the forward barrier,  $E_f$ ) is highlighted in red.  $E_r$  and  $\Delta E$  represents the reverse barrier (in eV) and the potential energy difference (in eV) between configuration "d" and "a", respectively.

## 6 Climbing-Image Nudged Elastic Band (CI-NEB) pathways for “near surface” diffusion

### 6.1 Diffusion in FCC systems

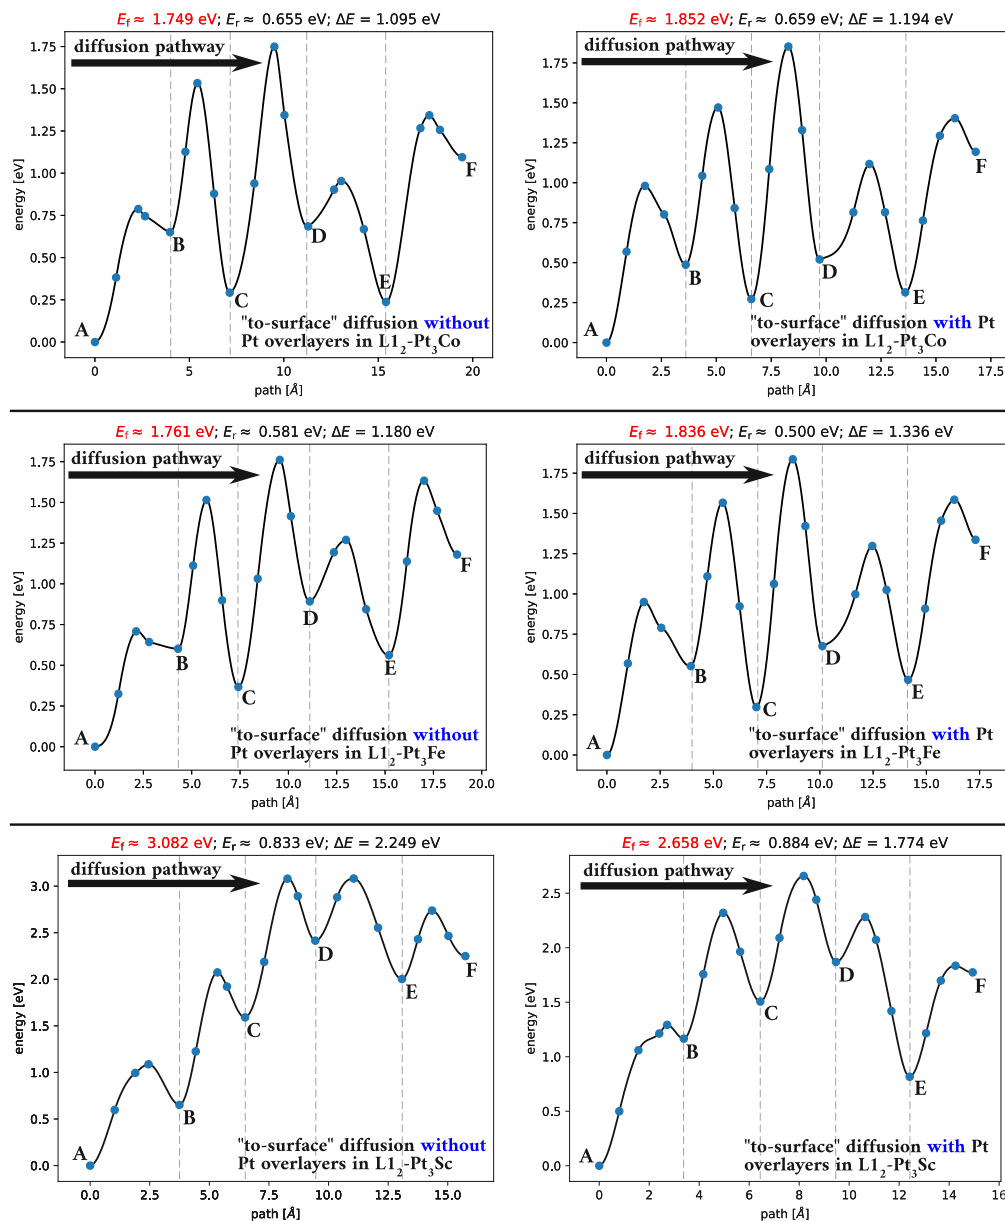

Figure S4: DFT calculated CI-NEB pathways for “near surface” diffusion in  $L1_2$ - $Pt_3M$  structures. The overall barrier (in eV) from configuration “A” to “F” (*i.e.*, the forward barrier,  $E_f$ ) is highlighted in red.  $E_r$  and  $\Delta E$  represents the reverse barrier (in eV) and the potential energy difference (in eV) between configuration “F” and “A”, respectively.

## 6.2 Diffusion in FCT systems

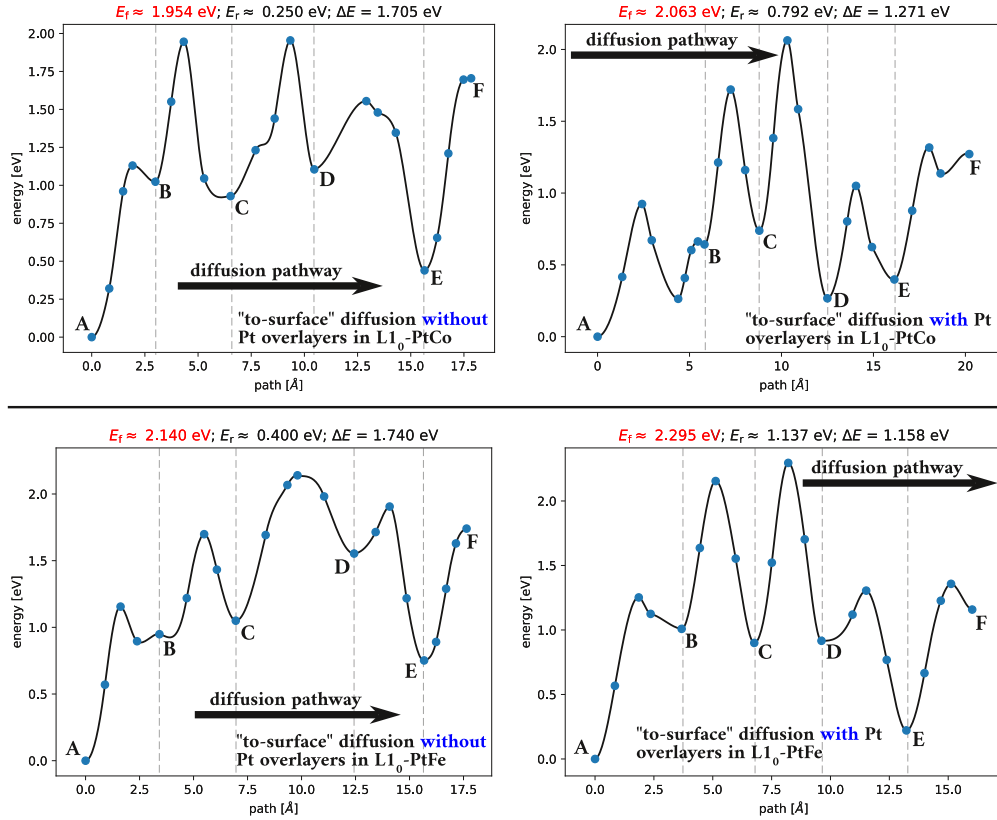

Figure S5: DFT calculated CI-NEB pathways for “near surface” diffusion in  $L1_0$ -Pt $M$  structures. The overall barrier (in eV) from configuration “A” to “F” (*i.e.*, the forward barrier,  $E_f$ ) is highlighted in red.  $E_r$  and  $\Delta E$  represents the reverse barrier (in eV) and the potential energy difference (in eV) between configuration “F” and “A”, respectively.

## 7 Rate (or time constant) comparisons

The diffusion barrier can be correlated to the rate of diffusion by

$$k = A e^{-\frac{\Delta E}{k_B T}}$$

Here,  $\Delta E$  is the overall diffusion barrier of a system for a given pathway (in eV),  $k_B$  is the Boltzmann constant (in eV/K),  $k$  is the rate of overall diffusion,  $A$  is the pre-exponential factor, and  $T$  is the temperature (in K). We compared two systems in terms of their rates of diffusion by

$$\frac{k_1}{k_2} = e^{\frac{\Delta E_2 - \Delta E_1}{k_B T}}$$

$$\ln \frac{k_1}{k_2} = \frac{\Delta E_2 - \Delta E_1}{k_B T}$$

Here,  $k_1$  and  $k_2$  are the rate of overall diffusion for the reference and target systems, respectively. A more positive value of  $\ln \frac{k_1}{k_2}$  suggests rate of diffusion in target system to be slower than the reference system by a factor of  $e^{\frac{\Delta E_2 - \Delta E_1}{k_B T}}$  and vice-versa.

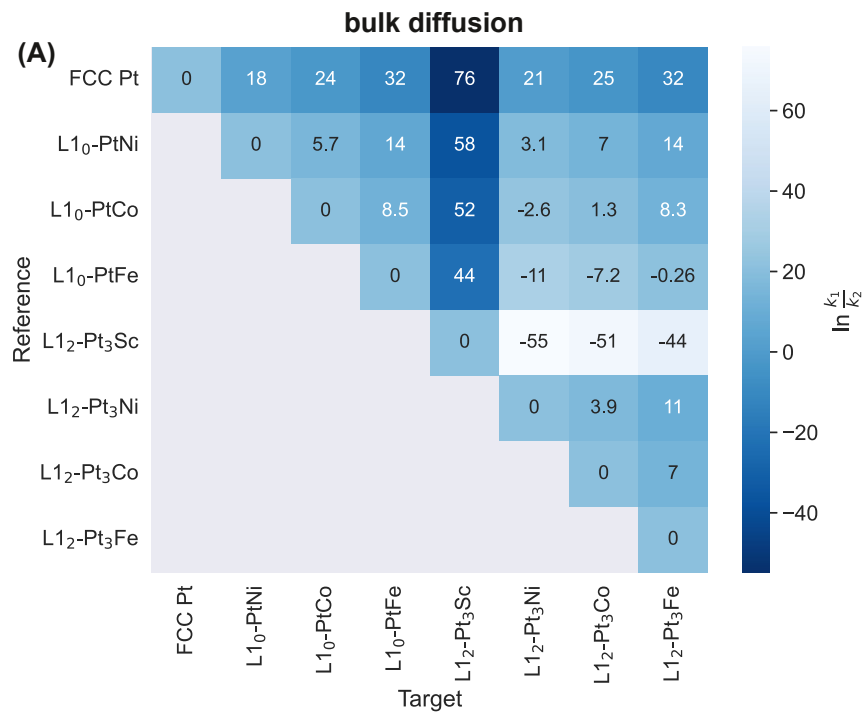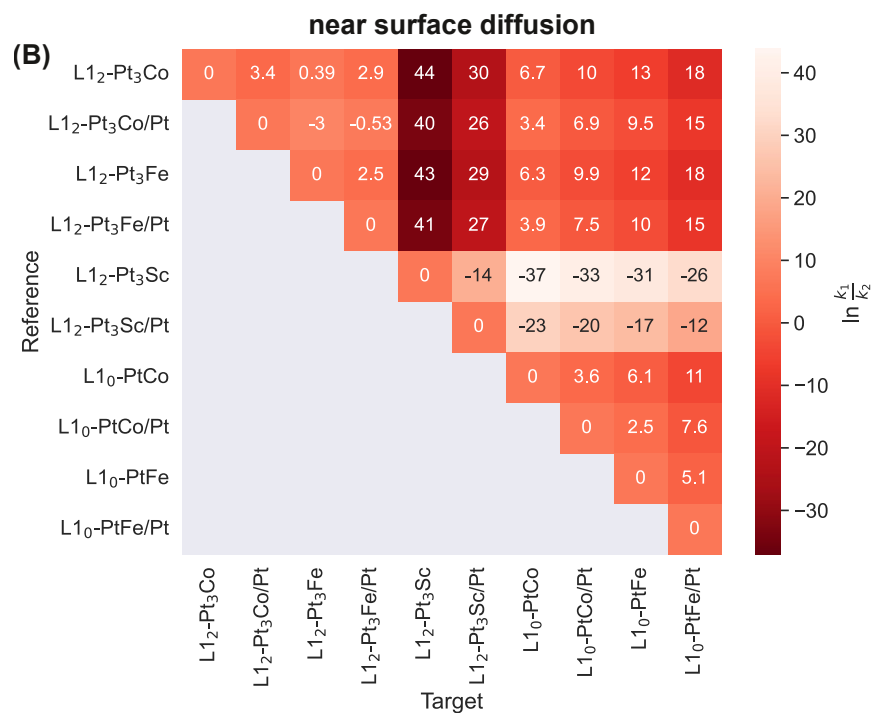

Figure S6: Comparison heatmap for rate of overall diffusion at T=80 °C for (A) bulk diffusion pathway and (B) near surface diffusion pathway.

## References

- [1] CRC Handbook, *CRC Handbook of Chemistry and Physics, 88th Edition*. CRC Press, 88 ed., 2007.
